# Supplementary material
Source: Springer Nature journal article supplement (https://www.springermedizin.de/resource/supplementary/12885_2014_5161_MOESM2_ESM.pdf/9468358)

A

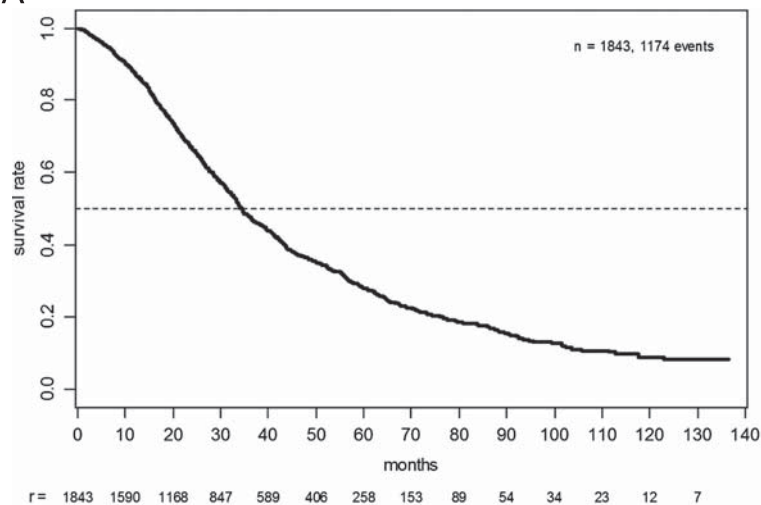

B

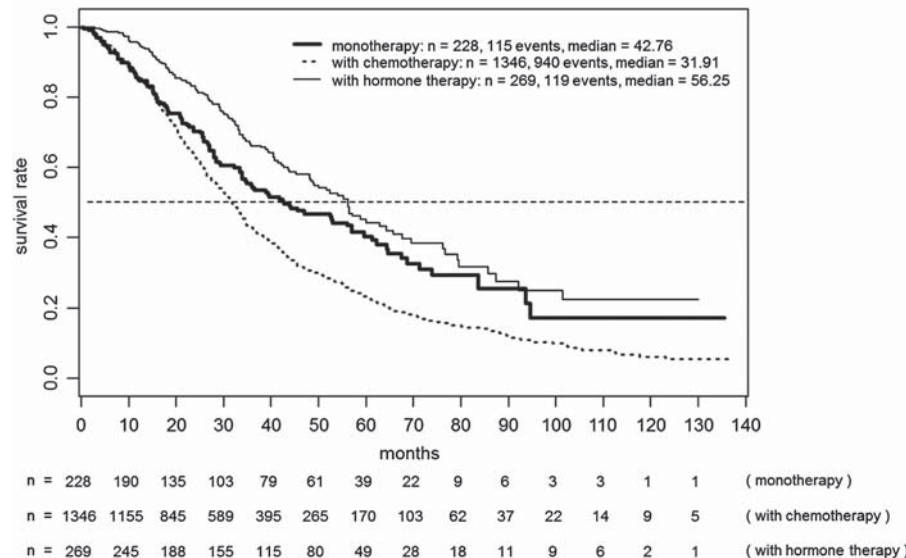

Supplement: MOESM2 [file 9468358]
